# Supplementary material for: Highly stretchable electromagnetic interference (EMI) shielding segregated polyurethane/carbon nanotube composites fabricated by microwave selective sintering
Source: Royal Society of Chemistry journal article supplement (doi:10.1039/c9tc02311a), 2019-01-01
Supplement: c9tc02311a1.pdf [file c9tc02311a1.pdf]

Supporting Information

**Highly stretchable electromagnetic interference (EMI) shielding  
polyurethane/carbon nanotubes composites fabricated by microwave selective  
sintering**

Dong Feng, Dawei Xu, Qingqing Wang, Pengju Liu\*

State Key Laboratory of Polymer Materials Engineering, Polymer Research Institute of  
Sichuan University, Chengdu, 610065, China

\*E-mail: sculpj@163.com

Table. S1 Comparison of EMI SE of our MS composites and the carbon-based filler/polymer composites reported in the literatures.

| Polymer | Filler type | Distribution | Filler content | Thickness (mm) | EMI SE (dB) | Ref.      |
|---------|-------------|--------------|----------------|----------------|-------------|-----------|
| TPU     | CNTs        | Segregated   | 5 wt%          | 2              | 35.3        | This work |
| TPU     | CNTs        | Segregated   | 3 wt%          | 2              | 25.6        | This work |
| PS      | CNTs        | Segregated   | 4 wt%          | 2.5            | 31.8        | 55        |
| PE      | CNTs        | Segregated   | 3 wt%          | 2.1            | ~35         | 19        |
| UHMWPE  | CNTs        | Segregated   | 4 wt%          | 1.6            | 32.6        | 20        |
| PVDF    | CNTs        | Segregated   | 5 wt%          | 2              | 17.7        | 15        |
| PPS     | CNTs        | Segregated   | 5 wt%          | 2              | 49.6        | 17        |
| TPU     | CNTs        | Random       | 20 wt%         | 2              | 17          | 56        |
| PE      | CNTs        | Random       | 10 wt%         | 1.65           | 22.4        | 57        |
| PC      | CNTs        | Random       | 5 wt%          | 1.85           | ~25         | 58        |
| PS      | CNTs        | Random       | 5 wt%          | 2              | ~25         | 12        |
| PVDF    | Graphite    | Random       | 15 wt%         | 3              | ~27         | 59        |
| PMMA    | Graphene    | Random       | 4.23 vol%      | 3.4            | ~30         | 60        |

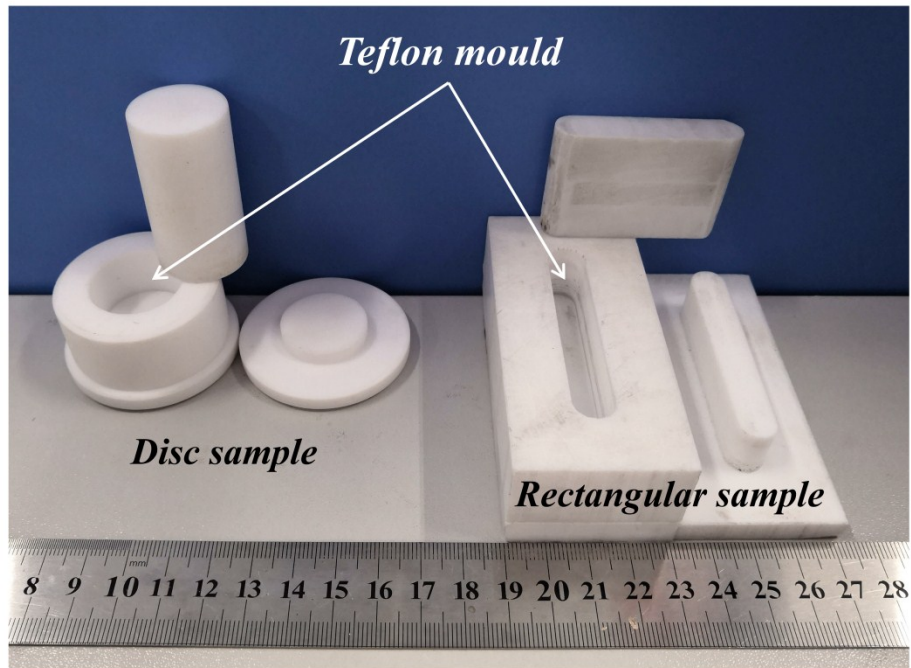

Fig. S1 Teflon mould for sintering TPU/CNTs composite in microwave oven.

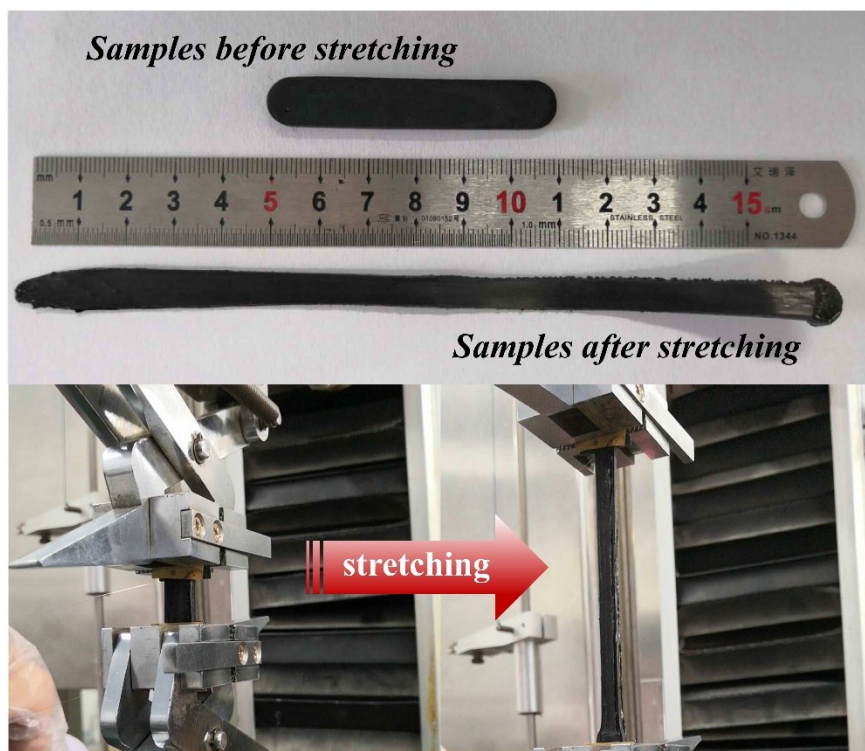

Fig. S2 Photograph showing MS<sub>5.0</sub> sample before stretching and stretched one at strain of 250%.

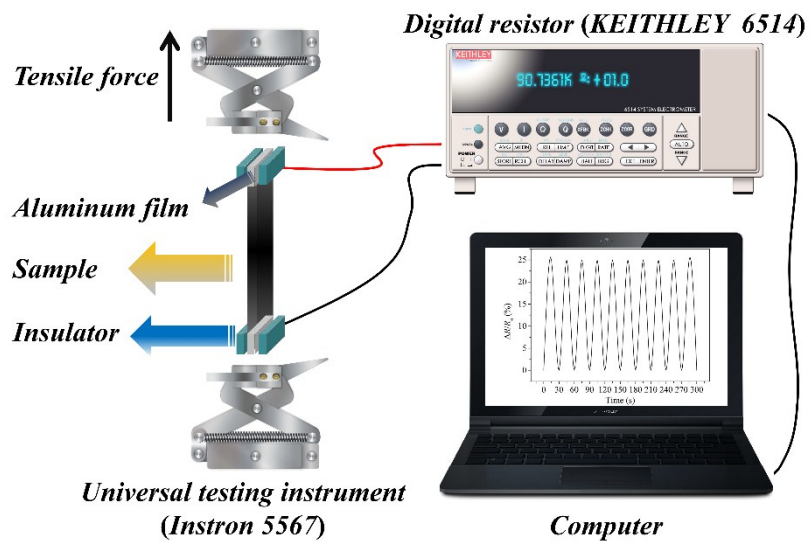

Fig. S3 Illustration showing the apparatus for real-time monitoring of electrical resistance of sample during stretching process.
